# Supplementary material
Source: publisher site journal article supplement (https://www.dovepress.com/article/503058)
Supplement: Supplementary file 1 [file get_supplementary_file.php]

**Supplementary Data S1.1 Dual-Platform Metabolomics Sample Preparation**

Remove the samples stored at -80°C, thaw them in an ice-water mixture, and transfer 150μL of the sample into a 1.5 mL Eppendorf tube; Add 600μL of protein precipitation agent methanol-acetonitrile (V=2:1, containing mixed internal standards, 4μg/mL), vortex for 1 minute. Sonicate in an ice-water bath for 10 minutes, then let it stand overnight at -40°C. Centrifuge for 10 minutes (12000rpm, 4°C), withdraw 150μL of supernatant with a syringe, filter through a 0.22μm organic phase needle filter, transfer to an LC autosampler vial, store at -80°C until LC-MS analysis. Simultaneously, take 150μL of supernatant and transfer it to a glass derivatization vial, dry the sample using a centrifugal concentrator. Add 80μL of methoxyamine hydrochloride pyridine solution (15mg/mL) to the glass derivatization vial, and shake in a 37°C shaking incubator for 60 minutes for an oximation reaction. After removing the sample, add 50μL of BSTFA derivatization reagent and 20μL of n-hexane, add 10 internal standards (C8/C9/C10/C12/C14/C16/C18/C20/C22/C24, all in chloroform) 10μL, react at 70°C for 60 minutes. After removing the sample, let it sit at room temperature for 30 minutes for GC-MS metabolomics analysis. Quality control samples (QC) were prepared by mixing equal volumes of extraction liquids from all samples. Note: All extraction reagents were pre-cooled at -20°C before use.

**Supplementary Data S1.2 Main Instruments**

| **Instrumentation** | **Models and specifications** | **Producers** |
| --- | --- | --- |
| Ultrasonic cleaning machine | F-060SD | Shenzhen Fuyang Technology Group Co., Ltd |
| Vortex Oscillator | TYXH-I | Shanghai Hannuo Instrument Co., Ltd |
| High-speed Freeze Centrifuge | TGL-16MS | Shanghai Luxiangyi Centrifuge Instrument Co., Ltd |
| Freeze Concentration Centrifugal Dryer | LNG-T98 | Huamei Biochemical Instrument Factory, Taicang City |
| Air Bath Thermostatic Shaker | THZ-82 | Shanghai LCB Instrument Technology Co., Ltd |
| Vacuum Drying Oven | DZF-6021 | Shanghai Huatai Co., Ltd |
| Liquid Chromatography-Mass Spectrometry (LC-MS) System | Waters ACQUITY UPLC I-Class plus/Thermo QE | Waters/Thermo |
| Liquid Chromatography Column | ACQUITY UPLC HSS T3（100mm×2.1mm,1.8um） | Waters |
| Gas Chromatography-Mass Spectrometry (GC-MS) System | Agilent 7890B-5977A | Agilent |
| Gas Chromatography Column | DB-5MS（30m×0.25mm×0.25μm） | Agilent |

**Supplementary Data S1.3 Major Reagents**

| **Reagent** | **Product code** | **Manufacturer** | **Purity** |
| --- | --- | --- | --- |
| Methanol | A452-4 | Fisher | HPLC，99.9% |
| Acetonitrile | A998-4 | Fisher | HPLC，99.95% |
| Formic acid | A117-50 | Fisher | HPLC，99.0% |
| Water | —— | Wahaha | / |
| L-2-Chlorophenylalanine (mixed internal standard) | C2001 | Shanghai Hengchuang Bio-Tech Co., Ltd | HPLC，98.0% |
| Succinic acid-d4 (mixed internal standard) | 293075-1G | Sigma | HPLC，98.0% |
| L-Valine-d8 (mixed internal standard) | HY-I1124 | Shanghai Haoyuan Biochemical Technology Co., Ltd | HPLC，98.0% |
| Cholic acid-D4 (mixed internal standard) | S22155-50mg | Shanghai Yuanye Biotechnology | HPLC，98.0% |
| Chloroform | G75915B | Greagent | AR级；99.0% |
| N-hexane | 4.011518.0500 | CNW | HPLC，98.5% |
| Pyridine | P141169-1L | Aladdin | HPLC，99.0% |
| BSTFA | B0830-25ml | TCI | 0.95 |
| O-Methylhydroxylamine hydrochloride (97%) | M813479-25g | Macklin | 0.98 |
| Methyl caprylate standard | G162300 | Dr.Ehrenstorfeh | HPLC，99.0% |
| Methyl nonanoate (C9:0) standard | N-9M-AU4-B | NU-chek | HPLC，99.0% |
| Methyl decanoate (C10:0) standard | N-10M-A18-D | NU-chek | HPLC，99.0% |
| Methyl laurate (C12:0) standard | N-12M-AU15-D | NU-chek | HPLC，99.0% |
| Methyl myristate (C14:0) standard | N-14M-A24-E | NU-chek | HPLC，99.0% |
| Methyl palmitate (C16:0) standard | G161798 | Dr.Ehrenstorfeh | HPLC，99.0% |
| Methyl stearate (C18:0) standard | N-18M-O9-C | NU-chek | HPLC，99.0% |
| Methyl arachidate (C20:0) standard | N-20M-J27-E | NU-chek | HPLC，99.0% |
| Methyl behenate (C22:0) standard | N-22M-JY30-E | NU-chek | HPLC，99.0% |
| Methyl lignocerate (C24:0) standard | N-24M-S6-A | NU-chek | HPLC，99.0% |

**Supplementary Data S1.4 Metabolomics Data Acquisition**

The experimental instrumentation used in this study consisted of a mass spectrometry platform system comprising Waters ACQUITY UPLC I-Class plus/Thermo QE ultra-high performance liquid chromatography-tandem high-resolution mass spectrometer and Agilent 7890B-5977A gas chromatography-mass spectrometer. MS-DIAL was used for small molecule mass deconvolution qualitative and quantitative analysis of gas chromatography-mass spectrometry (GC-MS) data collected in Full Scan mode. The original GC-MS data (D format) was converted to Analysis Base File (abf) format using Analysis Base File Converter software for rapid data retrieval. Subsequently, the data was imported into MS-DIAL software for preprocessing, where algorithms were used to extract chromatographic "model peaks," remove background noise, and achieve compound qualitative and quantitative analysis by matching retention time, fragment ion mass spectra, and similarity with in-house library databases. Compound identification was based on retention time (RT), accurate mass, secondary fragments, and isotopic distribution, using databases such as The Human Metabolome Database (HMDB), Lipidmaps (v2.3), METLIN, and the local LuMet-Animal3.0 database.

**Supplementary Data S1.5 Metabolomics Data Processing**

LC-MS/MS: Data extracted was processed for missing values, zero value replacement, score filtering, and data integration. Missing values and zero value replacement: Ion peaks with >50% missing values within each group were removed. The remaining zero values were replaced with half the minimum intensity across all ion samples. Score filtering: Compounds were filtered based on qualitative results score, with a cutoff of 36 points (maximum score 80); compounds scoring below 36 were considered inaccurately identified and removed. GC-MS: Internal standards were used for quality control of data. Internal standard peaks and known false positive peaks (including noise, column bleed, and derivatization reagent peaks) were removed from the original data matrix. Missing values and zero value replacement: Ion peaks with >50% missing values (zero values) within each group were deleted; remaining missing values (zero values) were replaced with half of the minimum value. GC-MS normalization: Total ion area normalization algorithm/peak area normalization algorithm: Modified from sample peak area/total peak area x 10000 to sample peak area/total peak area x means total peak area of all samples. Internal standard segmented normalization algorithm: For each sample, internal standards were used to segmentally normalize data based on RSD <0.1, i.e., segmented sample peak area/segmented internal standard peak area x means segmented internal standard peak area of all samples. Score filtering: After normalization, data underwent redundancy removal and peak merging. Compounds were filtered based on qualitative results score (Score), with a cutoff of 70 points (maximum score 100); compounds scoring below 70 were considered inaccurately identified and removed, resulting in a data matrix. Data integration: Positive and negative ion data from LC-MS/MS and data obtained from GC-MS were merged into a data matrix table containing all relevant information extracted from the original data for subsequent analysis.

| **Supplementary Table S1. Demographic and clinical characteristics of PACNS and non-inflammatory disease patients at admission.** | | | | |
| --- | --- | --- | --- | --- |
|  | **PACNS**  **(N=35)** | **ACTIVE**  **(N=26)** | **REMISSION (N=15)** | **NON-INFLAMMATORY (N=22)** |
| **Basic Information** | | | | |
| Age, median (range), y | 34 (28–45) | 31.0 (27.5–42.25) | 34 (29.0–45.0) | 38 (27.0–46.25) |
| Male, n (%) | 21 (60) | 16 (61.5) | 10 (66.7) | 10 (45.5) |
| **Neurological symptoms, n (%)** | | | | |
| Focal symptoms | 23 (65.7) | 17 (65.4) | 12 (80.0) | - |
| Headache | 11 (31.4) | 9 (34.6) | 4 (26.7) | - |
| Seizures | 14 (40.0) | 11 (42.3) | 6 (40.0) | - |
| Cognition | 7 (20.0) | 6 (23.1) | 2 (13.3) | - |
| **CSF parameters** | | | | |
| WBC count, cells/mm3 | 5 (3–11) | 5 (3–12) | 5 (2–17) | - |
| Protein level, mg/dL | 35.36 (27.73–55.06) | 36.00 (28.86–51.88) | 48.14 (16.59–59.44) | - |
| **Brain imaging, n (%)** | | | | |
| Angiographic abnormality | 19 (54.3) | 11 (42.3) | 8 (53.3) | - |
| Intensify | 34 (97.1) | 25 (96.2) | 15 (100) | - |
| PACNS: Primary angiitis of the central nervous system; CSF: Cerebrospinal fluid; WBC: White blood cell; Imaging modalities included magnetic resonance angiography, CT angiography, or cerebral angiogram. | | | | |

| 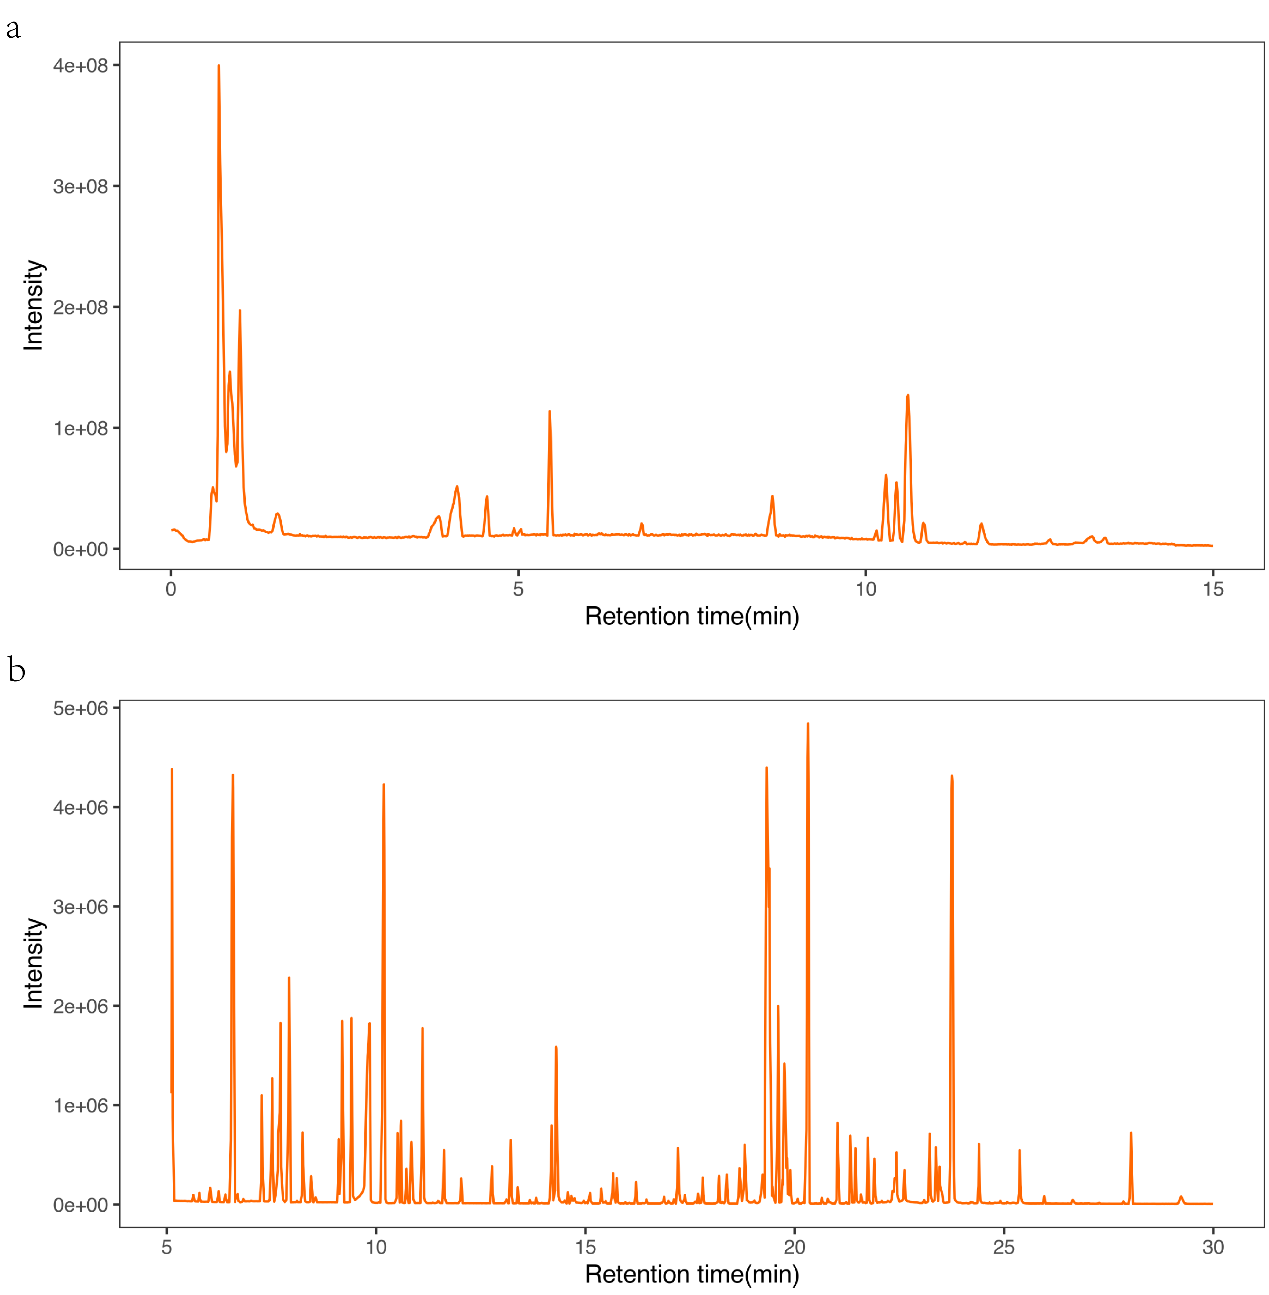 |
| --- |
| **Supplementary Figure S1** Representative LCMS (a) and GCMS (b) chromatograms of PACNS-1 (spectra obtained by successive depiction of the intensity of the strongest ion in the chromatogram at each time point). |

| 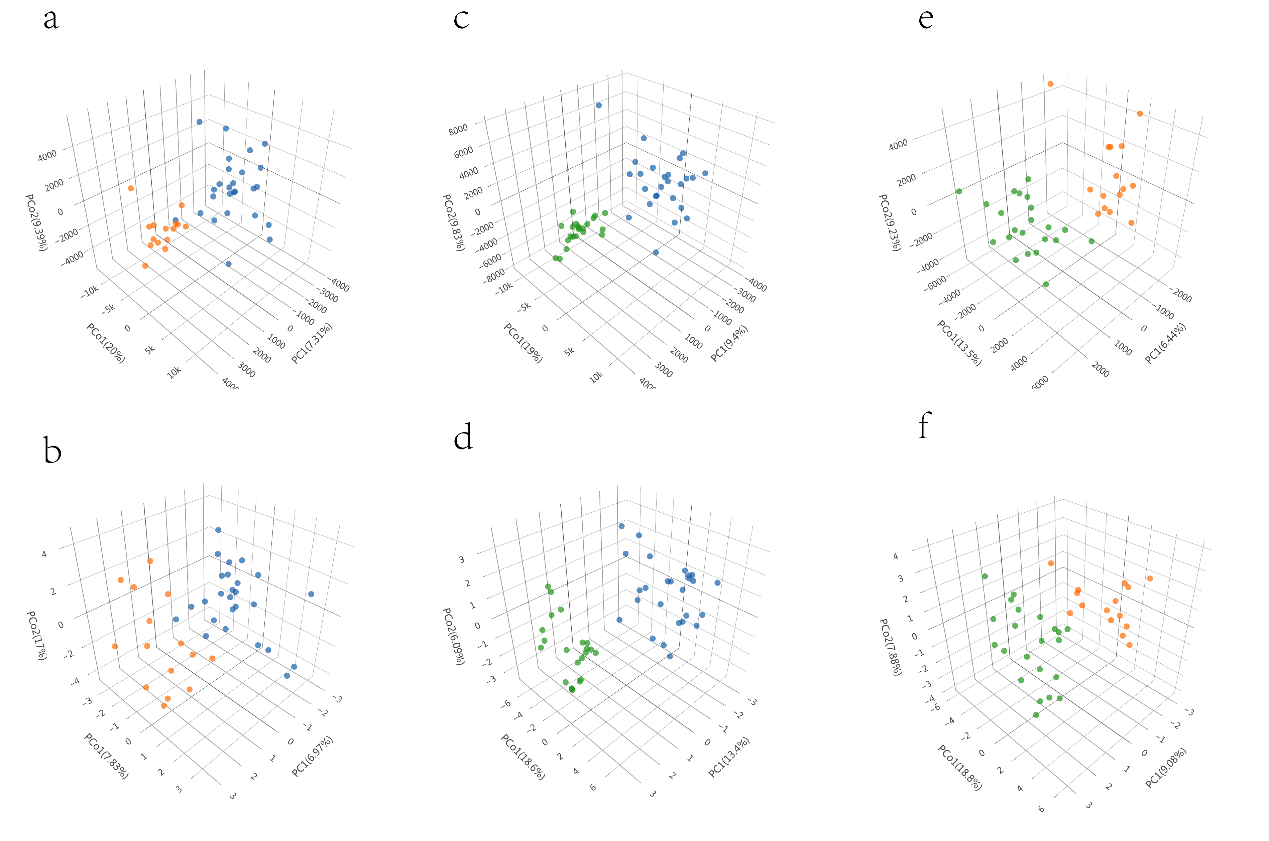 |
| --- |
| **Supplementary Figure S2** Model score plots for orthogonal PLS-DA (OPLS-DA). a, b: OPLS-DA of LC-MS and GC-MS between V2 vs. V1; c, d: OPLS-DA of LC-MS and GC-MS between V1 vs. V3; e, f: OPLS-DA of LC-MS and GC-MS between V2 vs. V3; blue, orange, and green dots correspond to V1, V2, and V3 groups, respectively. |

| 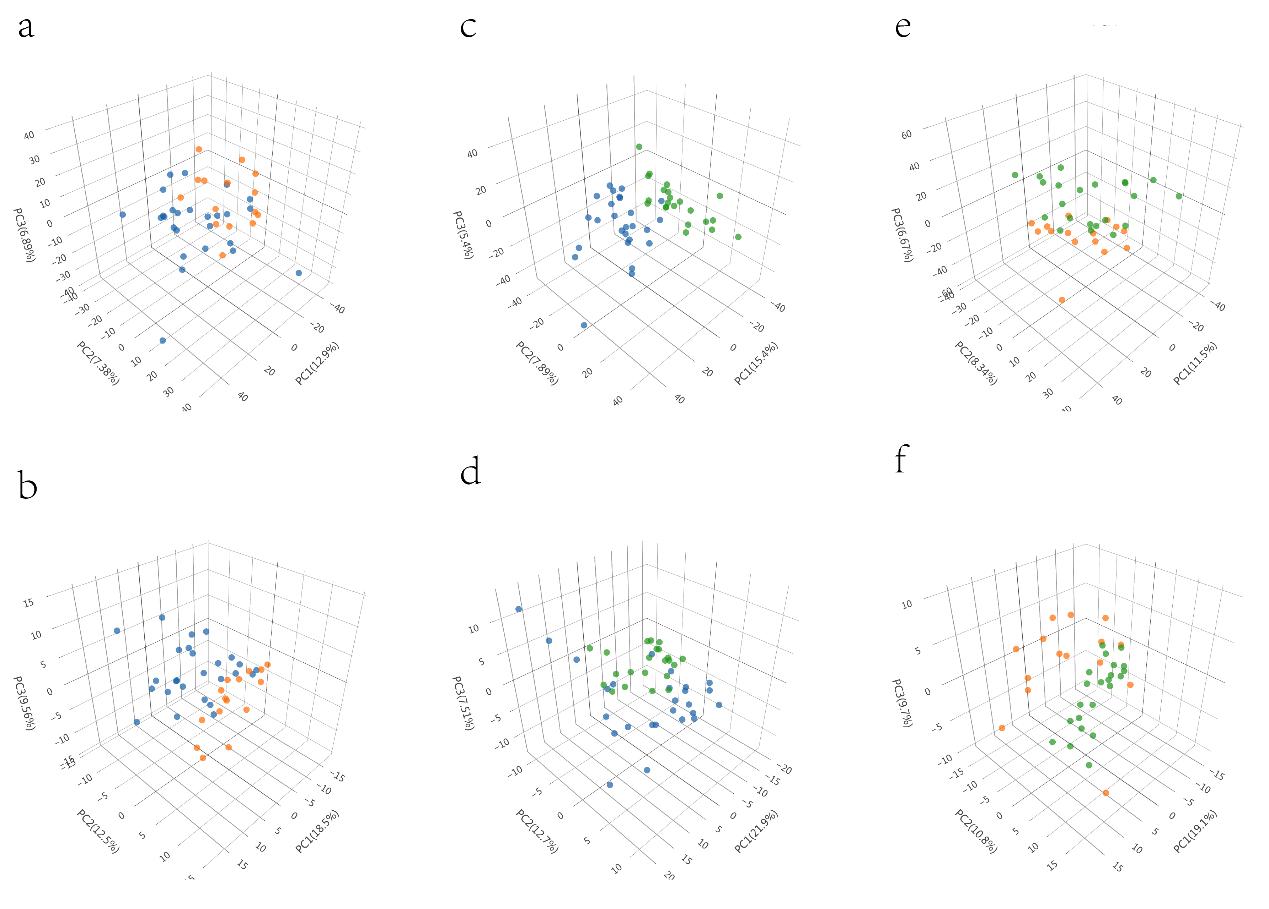 |
| --- |
| **Supplementary Figure S3** Unsupervised Principal Component Analysis (PCA). a, b: PCA of LC-MS and GC-MS between V2 vs. V1; c, d: PCA of LC-MS and GC-MS between V1 vs. V3; e, f: PCA of LC-MS and GC-MS between V2 vs. V3; blue, orange, and green dots correspond to V1, V2, and V3 groups, respectively. |

| 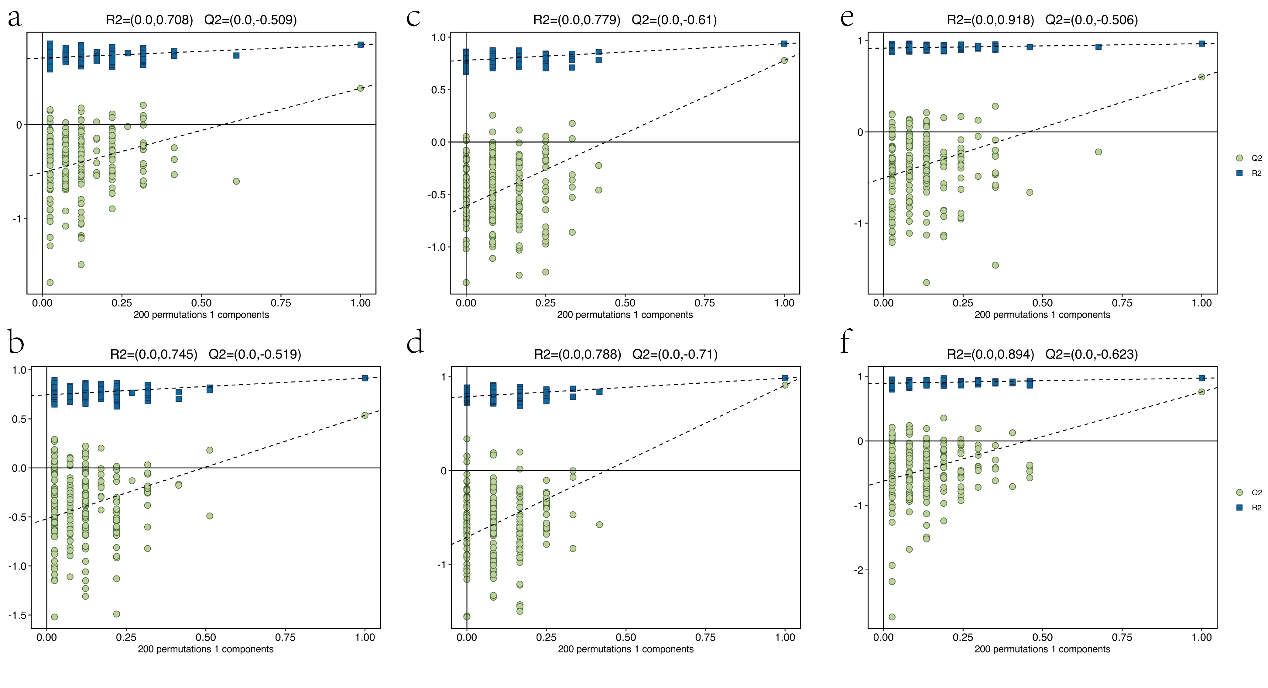 |
| --- |
| **Supplementary Figure S4** Permutation test for supervised methods (n=200 permutations). a, b: LC-MS and GC-MS between V2 vs. V1; c, d: LC-MS and GC-MS between V1 vs. V3; e, f: LC-MS and GC-MS between V2 vs. V3. |
